# Supplementary material
Source: HighWire-hosted journal article supplement (http://molpharm.aspetjournals.org/highwire/filestream/76873/field_highwire_adjunct_files/1/Bhave_SuppFig._2.pdf)
Supplement: Bhave_SuppFig._2.pdf [file Bhave_SuppFig._2.pdf]

**Development of a selective small-molecule inhibitor of Kir1.1, the Renal Outer Medullary Potassium Channel.** Gautam Bhawe, Brian A. Chauder, Wen Liu, Eric S. Dawson, Rishin Kadakia, Thuy, T. Nguyen, L. Michelle Lewis, Jens Meiler, C. David Weaver, Lisa M. Satlin, Craig W. Lindsley, and Jerod S. Denton. *Molecular Pharmacology*.

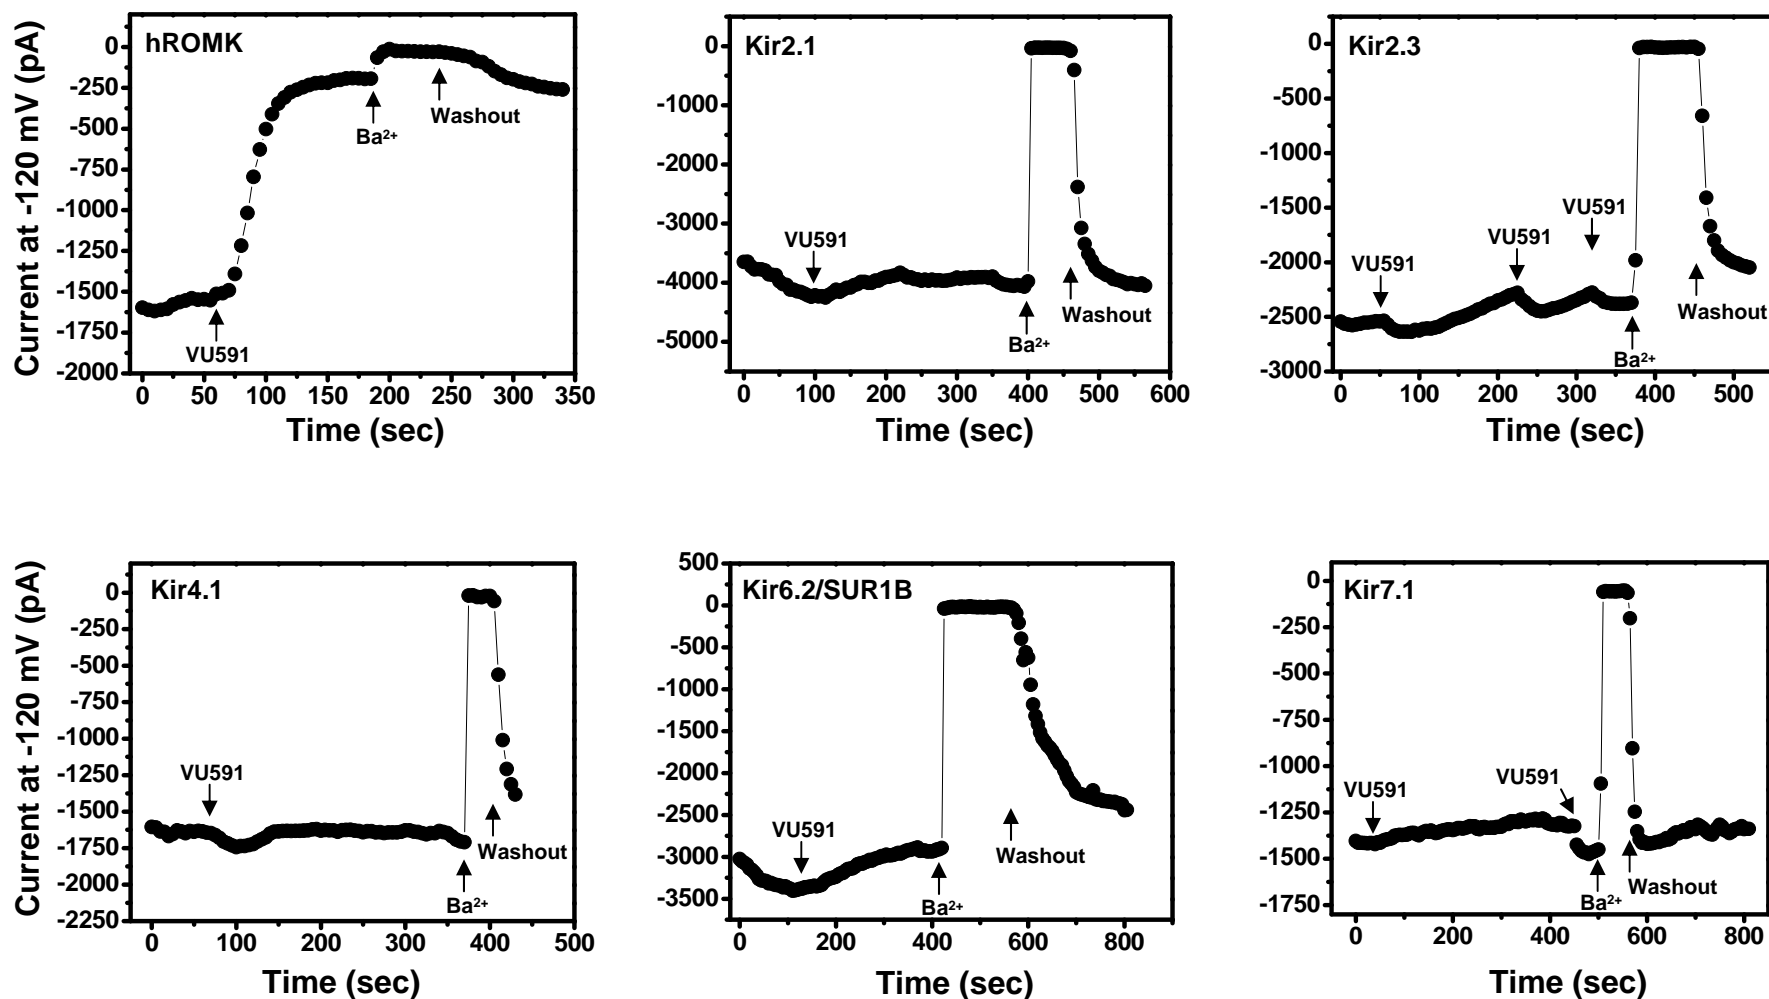

**Supplemental Figure 2.** Representative time course data showing the effects of 10  $\mu$ M VU591 or 2 mM barium ( $\text{Ba}^{2+}$ ; control blocker) on the indicated Kir channel expressed in HEK-293 cells. The cells were voltage clamped using the protocol described in supporting Fig. S1 legend. Current recorded at -120 mV is shown.
